# Supplementary material for: Temporal variability is a personalized feature of the human microbiome
Source: PubMed Central journal article supplement (PMC4252997; doi:10.1186/s13059-014-0531-y), 2014-12-03
Supplement: 13059_2014_531_MOESM6_ESM.pdf [file 13059_2014_531_MOESM6_ESM.pdf]

**Additional file 6. The composition of each individual's microbiome was unique as determined by three different non-parametric, permutational tests. Test statistics and p-values are reported for each comparison.**

|                    | Adonis ( $R^2$ ) | ANOSIM ( $R$ ) | PERMDISP ( $F$ ) |
|--------------------|------------------|----------------|------------------|
| <b>Forehead</b>    |                  |                |                  |
| Weighted UniFrac   | 0.622; 0.001     | 0.637; 0.001   | 3.653; 0.001     |
| Unweighted UniFrac | 0.293; 0.001     | 0.678; 0.001   | 3.625; 0.001     |
| <b>Gut</b>         |                  |                |                  |
| Weighted UniFrac   | 0.444; 0.001     | 0.428; 0.001   | 3.140; 0.001     |
| Unweighted UniFrac | 0.485; 0.001     | 0.860; 0.001   | 2.522; 0.001     |
| <b>Palm</b>        |                  |                |                  |
| Weighted UniFrac   | 0.436; 0.001     | 0.433; 0.001   | 1.665; 0.004     |
| Unweighted UniFrac | 0.288; 0.001     | 0.651; 0.001   | 3.505; 0.001     |
| <b>Tongue</b>      |                  |                |                  |
| Weighted UniFrac   | 0.467; 0.001     | 0.420; 0.001   | 1.843; 0.001     |
| Unweighted UniFrac | 0.365; 0.001     | 0.534; 0.001   | 3.227; 0.001     |
|                    |                  |                |                  |
