# Supplementary material for: Temporal variability is a personalized feature of the human microbiome
Source: PubMed Central journal article supplement (PMC4252997; doi:10.1186/s13059-014-0531-y), 2014-12-03

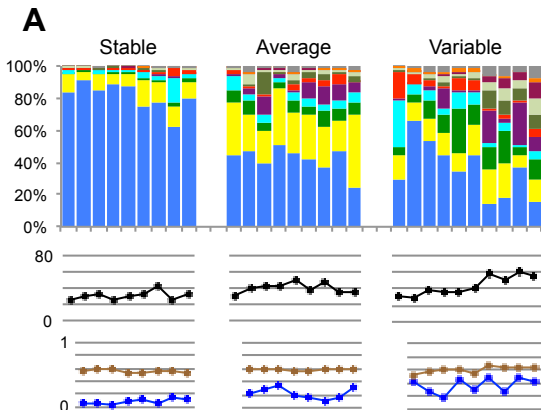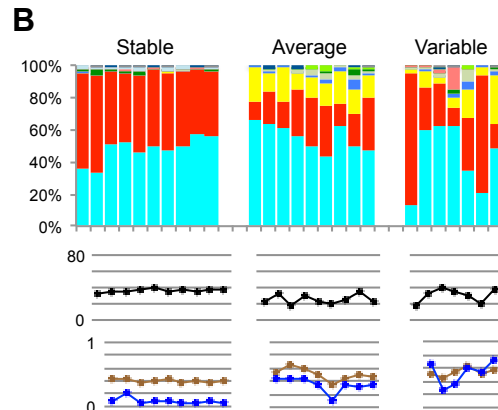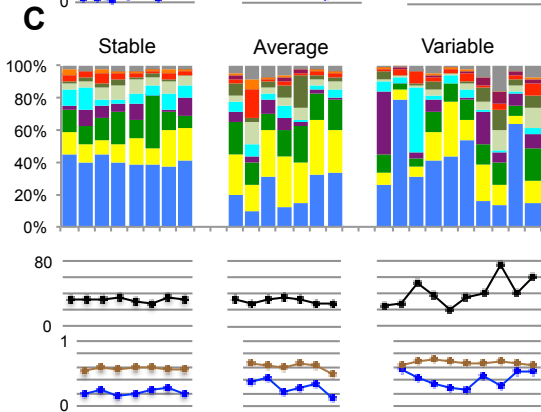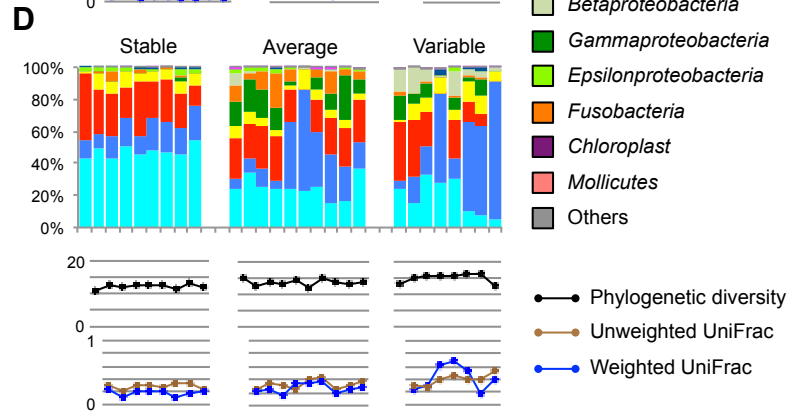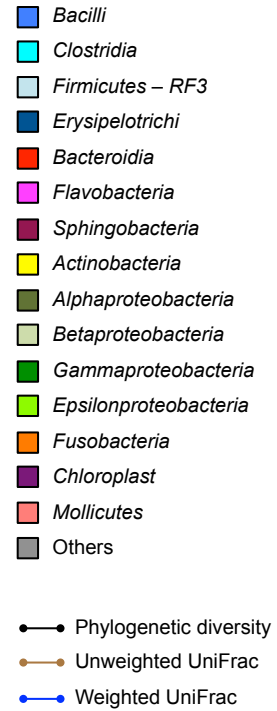

Supplement: 13059_2014_531_MOESM7_ESM.pdf [file 13059_2014_531_MOESM7_ESM.pdf]
