# Supplementary material for: Temporal variability is a personalized feature of the human microbiome
Source: PubMed Central journal article supplement (PMC4252997; doi:10.1186/s13059-014-0531-y), 2014-12-03
Supplement: 13059_2014_531_MOESM8_ESM.pdf [file 13059_2014_531_MOESM8_ESM.pdf]

**Additional file 8. Spearman rank correlations of median unweighted UniFrac distances per individual across body habitats.** Rho values and the number of individuals compared in each test are shown. \*\* = corrected  $p \leq 0.01$ .

|          | Forehead      | Gut         | Palm        |
|----------|---------------|-------------|-------------|
| Forehead |               |             |             |
| Gut      | 0.169; n=71   |             |             |
| Palm     | 0.699**; n=61 | 0.008; n=55 |             |
| Tongue   | 0.039; n=76   | 0.237; n=71 | 0.113; n=58 |
