# Supplementary material for: Temporal variability is a personalized feature of the human microbiome
Source: PubMed Central journal article supplement (PMC4252997; doi:10.1186/s13059-014-0531-y), 2014-12-03
Supplement: 13059_2014_531_MOESM9_ESM.pdf [file 13059_2014_531_MOESM9_ESM.pdf]

**Additional file 9. Spearman rank correlations of median weighted UniFrac distances per individual across body habitats.** Rho values and the number of individuals compared in each test are shown. \*\* = corrected  $p \leq 0.01$ .

|          | Forehead      | Gut          | Palm        |
|----------|---------------|--------------|-------------|
| Forehead |               |              |             |
| Gut      | -0.076; n=71  |              |             |
| Palm     | 0.413**; n=61 | -0.138; n=55 |             |
| Tongue   | 0.173; n=76   | 0.232; n=71  | 0.013; n=58 |
