# Supplementary material for: Temporal variability is a personalized feature of the human microbiome
Source: PubMed Central journal article supplement (PMC4252997; doi:10.1186/s13059-014-0531-y), 2014-12-03
Supplement: 13059_2014_531_MOESM10_ESM.pdf [file 13059_2014_531_MOESM10_ESM.pdf]

**Additional file 10. Summary of Mantel tests of correlation between time distance measure in weeks and community composition.** Numerator of fraction represents the number of individuals with a statistically significant positive correlation (uncorrected  $p \leq 0.05$ ) based on Spearman's rank correlation. Denominator is total number of individuals compared. Note that these results are based on uncorrected p-values and the expected number of false positives rounded to the nearest whole number is indicated in parentheses.

|                    | Forehead     | Gut          | Palm         | Tongue       |
|--------------------|--------------|--------------|--------------|--------------|
| Weighted UniFrac   | 8/80<br>(4)  | 7/75<br>(4)  | 7/61<br>(3)  | 15/80<br>(4) |
| Unweighted UniFrac | 20/80<br>(4) | 12/75<br>(4) | 13/61<br>(3) | 14/80<br>(4) |
