# Supplementary material for: Temporal variability is a personalized feature of the human microbiome
Source: PubMed Central journal article supplement (PMC4252997; doi:10.1186/s13059-014-0531-y), 2014-12-03
Supplement: 13059_2014_531_MOESM11_ESM.pdf [file 13059_2014_531_MOESM11_ESM.pdf]

**Additional file 11.** Relationship between diversity and stability for microbial communities associated with four human body habitats. Spearman’s rho values were determined for each combination of median weighted (WUniFrac) and unweighted (UUniFrac) UniFrac distances and median diversity values over time across individuals. Positive rho values indicate that more diverse communities are less stable over time while negative values indicate that more diverse communities are more stable. Statistical significance is indicated with asterisks (\* = uncorrected  $p \leq 0.05$ , \*\* = uncorrected  $p \leq 0.01$ ).

|                 | Forehead |          | Gut      |          | Palm     |          | Tongue   |          |
|-----------------|----------|----------|----------|----------|----------|----------|----------|----------|
|                 | WUniFrac | UUniFrac | WUniFrac | UUniFrac | WUniFrac | UUniFrac | WUniFrac | UUniFrac |
| Median Shannon  | 0.610**  | 0.064    | -0.168   | -0.517** | 0.051    | -0.088   | -0.152   | -0.469** |
| Median PD       | 0.267*   | 0.074    | -0.185   | -0.579** | -0.046   | -0.164   | -0.055   | -0.125   |
| Median Richness | 0.292**  | 0.042    | -0.343** | -0.624** | -0.094   | -0.192   | -0.096   | -0.007   |
